# Supplementary material for: Whole genome sequencing of group A Streptococcus: development and evaluation of an automated pipeline for emmgene typing
Source: PeerJ. 2017 Apr 27;5:e3226. doi: 10.7717/peerj.3226 (PMC5410157; doi:10.7717/peerj.3226)
Supplement: Table S3 — Discordant isolates were investigated further using de novo assembly and BLAST to resolve the discrepancies between the two methods. [file peerj-05-3226-s003.xlsx]

## Sheet: Table S3
Supplementary Table 3: Summary table for de novo assembly investigations (discordant isolates; n=89)
	emm type
SampleID	Wet Lab	NGS	DenovoResult	COMMENTS
GASEMM0365	3.93	1	3.93/1.0	Contamination
GASEMM0399	3.23	130	3.23	Low mapping coverage for 3.23
GASEMM0728	3.1	28.0	28.0	NGS correct; human sampling error
GASEMM0861	1.0	75.0	75.0	NGS correct; human sampling error
GASEMM0870	89.0	75.0	75.0/89.0	Contamination
GASEMM1078	89.0	1.0	89.0/1.0	Contamination
GASEMM1153	4.0	1.0	1.0	NGS correct; human sampling error
GASEMM1386	3.1	90.2	90.2	NGS correct; human sampling error
GASEMM1484	8.0	94.0	94.0	NGS correct; human sampling error
GASEMM1488	12.0	94.0	94.0	NGS correct; human sampling error
GASEMM1684	170.0	75	75/170.0	NGS correct; Sanger returns non-validated
GASEMM1803	9.0	3.1	3.1/9.0	Contamination
GASEMM1880	169.3	60	60/169.3	NGS correct; Sanger returns non-validated
GASEMM1942	230.0	34	34/230.0	NGS correct; Sanger returns non-validated
GASEMM1974	6.0	3.1	3.1/6.0	Contamination
GASEMM2191	75.0	89.0	89.0	NGS correct; human sampling error
GASEMM2239	75.0	12.0	12.0	NGS correct; human sampling error
GASEMM2240	1.0	104.0	104.0	NGS correct; human sampling error
GASEMM2247	75.0	6.0	6.0	NGS correct; human sampling error
GASEMM2248	3.1	89.0	89.0	NGS correct; human sampling error
GASEMM2250	12.0	75.0	75.0	NGS correct; human sampling error
GASEMM2252	104.0	1.0	1.0	NGS correct; human sampling error
GASEMM2253	28.0	6.0	6.0	NGS correct; human sampling error
GASEMM2254	87.0	3.1	3.1	NGS correct; human sampling error
GASEMM2255	1.0	12.0	12.0	NGS correct; human sampling error
GASEMM2256	66.0	3.1	3.1	NGS correct; human sampling error
GASEMM2257	75.0	87.0	87.0	NGS correct; human sampling error
GASEMM2258	18.0	1.0	1.0	NGS correct; human sampling error
GASEMM2259	1.0	3.1	3.1	NGS correct; human sampling error
GASEMM2260	2.0	12.84	12.84	NGS correct; human sampling error
GASEMM2261	6.4	94.0	94.0	NGS correct; human sampling error
GASEMM2262	28.0	1.0	1.0	NGS correct; human sampling error
GASEMM2263	28.0	12.0	12.0	NGS correct; human sampling error
GASEMM2264	89.0	3.1	3.1	NGS correct; human sampling error
GASEMM2265	81.0	28.0	28.0	NGS correct; human sampling error
GASEMM2266	1.0	89.0	89.0	NGS correct; human sampling error
GASEMM2267	3.1	1.0	1.0	NGS correct; human sampling error
GASEMM2268	89.0	66.0	66.0	NGS correct; human sampling error
GASEMM2269	94.0	75.0	75.0	NGS correct; human sampling error
GASEMM2270	28.0	81.0	81.0	NGS correct; human sampling error
GASEMM2271	44.0	28.0	28.0	NGS correct; human sampling error
GASEMM2272	3.1	12.0	12.0	NGS correct; human sampling error
GASEMM2273	12.84	75.0	75.0	NGS correct; human sampling error
GASEMM2275	4.0	1.0	1.0	NGS correct; human sampling error
GASEMM2276	1.0	44	44.0	NGS correct; human sampling error
GASEMM2308	169.3	60	60/169.3	NGS correct; Sanger returns non-validated
GASEMM2469	5.23	1.0	1.0/5.23	Contamination
GASEMM2574	218.1	12.0	12.0	NGS correct; human sampling error
GASEMM2577	1.0	218.1	218.1	NGS correct; human sampling error
GASEMM2579	92.0	1.0	1.0	NGS correct; human sampling error
GASEMM2592	1.0	3.104	3.104	NGS correct; human sampling error
GASEMM2593	87.0	1.0	1.0	NGS correct; human sampling error
GASEMM2595	28.0	87.0	87.0	NGS correct; human sampling error
GASEMM2596	1.0	28.0	28.0	NGS correct; human sampling error
GASEMM2597	28.0	12	12	NGS correct; human sampling error
GASEMM2598	81.0	28.0	28.0	NGS correct; human sampling error
GASEMM2599	170.0	92.0	92.0	NGS correct; human sampling error
GASEMM2600	1.0	75.0	75.0	NGS correct; human sampling error
GASEMM2601	3.104	1.0	1.0/3.104	Contamination
GASEMM2603	6.0	81.0	81.0	NGS correct; human sampling error
GASEMM2604	28.0	75.0	75.0	NGS correct; human sampling error
GASEMM2605	3.1	12.7	12.7	NGS correct; human sampling error
GASEMM2606	1.0	5.3	5.3	NGS correct; human sampling error
GASEMM2607	28.0	3.1	3.1	NGS correct; human sampling error
GASEMM2608	89.0	28.0	28.0	NGS correct; human sampling error
GASEMM2609	230.0	89.0	89.0	NGS correct; human sampling error
GASEMM2610	1.0	34	34	NGS correct; human sampling error
GASEMM2611	12.0	1.0	1.0	NGS correct; human sampling error
GASEMM2613	3.1	6.0	6.0	NGS correct; human sampling error
GASEMM2614	1.0	3.1	3.1	NGS correct; human sampling error
GASEMM2615	5.3	1.0	1.0	NGS correct; human sampling error
GASEMM2616	28.0	1.0	1.0	NGS correct; human sampling error
GASEMM2617	1.0	6.0	6.0	NGS correct; human sampling error
GASEMM2618	12.0	28.0	28.0	NGS correct; human sampling error
GASEMM2619	1.0	12.0	12.0	NGS correct; human sampling error
GASEMM2620	3.1	1.0	1.0	NGS correct; human sampling error
GASEMM2621	1.0	3.1	3.1	NGS correct; human sampling error
GASEMM2622	89.0	1.0	1.0	NGS correct; human sampling error
GASEMM2623	1.79	89.0	89.0	NGS correct; human sampling error
GASEMM2624	205.0	1.24	1.24	NGS correct; human sampling error
GASEMM2625	76.0	18.0	18.0	NGS correct; human sampling error
GASEMM2626	3.1	76.0	76.0	NGS correct; human sampling error
GASEMM2627	87.0	3.1	3.1	NGS correct; human sampling error
GASEMM2628	12.0	87.0	87.0	NGS correct; human sampling error
GASEMM2629	12.0	3.1	3.1	NGS correct; human sampling error
GASEMM2653	126.1	89	89	NGS correct; human sampling error
GASEMM2858	89.0	1.0	1.0/89.0	Contamination
GASEMM2860	1.0	28.0	28.0	NGS correct; human sampling error
GASEMM3000	42.0	28.0	28.0	NGS correct; human sampling error
