# Supplementary material for: Whole genome sequencing of group A Streptococcus: development and evaluation of an automated pipeline for emmgene typing
Source: PeerJ. 2017 Apr 27;5:e3226. doi: 10.7717/peerj.3226 (PMC5410157; doi:10.7717/peerj.3226)
Supplement: Table S4 — Positional analysis using de novo assembly and BLAST analysis was used to confirm (a) the presence of both validated and non-validated emm gene types on the chromosome and (b) the status of these non-validated emm types as emm-like genes. [file peerj-05-3226-s004.xlsx]

## Sheet: Table S4
Supplementary Table 4: De novo assembly investigation of known and novel emm/emm-like pairs
emm gene	emm-like gene	#Isolates in dataset	#Isolates investigated
emm19.4	emm134.1	1	1
emm2.0	emm149.2	37	5
emm73.0	emm149.2	16	5
emm22.0	emm156.0	17	5
emm4.0	emm156.0	112	4
emm4.13	emm156.0	2	2
emm4.4	emm156.0	1	1
emm78.3	emm156.0	1	1
emm25.0	emm159.0	1	1
emm77.0	emm159.0	14	2
emm81.0	emm164.3	9	2
emm100.0	emm167.0	1	1
emm75.0	emm170.0	125	16
emm75.1	emm170.0	1	1
emm22.0	emm170.1	1	1
emm53.0	emm174.1	1	1
emm11.0	emm202.1	42	2
emm11.1	emm202.1	5	2
emm11.12	emm202.1	1	1
emm123.0	emm205.0	1	1
emm18.0	emm205.0	13	2
emm18.29	emm205.0	2	2
emm80.0	emm205.1	1	1
emm76.0	emm236.2	14	2
