# Supplementary material for: Whole genome sequencing of group A Streptococcus: development and evaluation of an automated pipeline for emmgene typing
Source: PeerJ. 2017 Apr 27;5:e3226. doi: 10.7717/peerj.3226 (PMC5410157; doi:10.7717/peerj.3226)
Supplement: Table S5 [file peerj-05-3226-s005.xlsx]

## Sheet: TableS5
Supplementary Table 5: Comparison of results from Athey et al and EMM-Typing Tool described in this study.
ENA_number	Strain_name	Athey et al Result	EMM-Typing Tool Result	FLAG	Comments
SRR1106010	NGAS668	87	87	TRUE
SRR1105925	NGAS339	59	59.0	TRUE
SRR1105891	NGAS282	89	89.0	TRUE
SRR1105918	NGAS330	41	41.2	TRUE
SRR1105866	NGAS123	6	6.79	TRUE
SRR1105952	NGAS490	87	87.0	TRUE
SRR1106011	NGAS669	87	87	TRUE
SRR1106001	NGAS650	3	3.60	TRUE
SRR1106031	NGAS757	82	82.0	TRUE
SRR1105960	NGAS516	89	89.0	TRUE
SRR1105900	NGAS299	87	87.0	TRUE
SRR1105903	NGAS304	28	28.0	TRUE
SRR1105927	NGAS341	87	87.0	TRUE
SRR1105868	NGAS130	191	191.0	TRUE
SRR1106020	NGAS729	94	94.0	TRUE
SRR1105969	NGAS594	82	82.0	TRUE
SRR1105873	NGAS165	3	3.1	TRUE
SRR1105924	NGAS338	82	82.0	TRUE
SRR1105983	NGAS613	82	82.0	TRUE
SRR1105869	NGAS145	12	12.0	TRUE
SRR1105882	NGAS228	4	4.0	TRUE
SRR1105936	NGAS372	92	92.0	TRUE
SRR1105902	NGAS302	28	28.0	TRUE
SRR1105876	NGAS187	82	82.0	TRUE
SRR1105894	NGAS290	87	87.0	TRUE
SRR1104742	NGAS005	90	90.2	TRUE
SRR1105986	NGAS618	6	6.0	TRUE
SRR1105875	NGAS185	12	12.8	TRUE
SRR1105874	NGAS169	77	77.0	TRUE
SRR1105864	NGAS104	3	3.53	TRUE
SRR1105929	NGAS345	82	82.0	TRUE
SRR1105977	NGAS605	82	82.0	TRUE
SRR1105953	NGAS493	4	4.0	TRUE
SRR1105963	NGAS532	11	11.0	TRUE
SRR1105932	NGAS353	58	58.0	TRUE
SRR1105981	NGAS610	87	87.0	TRUE
SRR1106032	NGAS758	4	4.0	TRUE
SRR1104980	NGAS088	89	89.0	TRUE
SRR1105901	NGAS300	83	83.1	TRUE
SRR1105895	NGAS291	87	87.0	TRUE
SRR1105972	NGAS597	82	82.0	TRUE
SRR1104973	NGAS070	89	89.0	TRUE
SRR1105962	NGAS524	89	89.0	TRUE
SRR1104964	NGAS015	63	63.3	TRUE
SRR1105879	NGAS209	18	18.0	TRUE
SRR1105984	NGAS615	82	82.0	TRUE
SRR1105959	NGAS510	9	9.2	TRUE
SRR1105937	NGAS401	102	102.2	TRUE
SRR1105920	NGAS334	115	115.0	TRUE
SRR1105933	NGAS358	169	60	FALSE	Mapping and de novo detect both emm60 and emm169.3
SRR1105964	NGAS535	192	138.0	FALSE	Mapping and de novo detect both emm138.0 and emm192.0
SRR1104965	NGAS025	89	89.0	TRUE
SRR1104981	NGAS094	3	3.1	TRUE
SRR1106026	NGAS747	87	87.0	TRUE
SRR1105883	NGAS233	89	89.0	TRUE
SRR1105872	NGAS162	6	6.0	TRUE
SRR1105934	NGAS364	77	77.0	TRUE
SRR1105955	NGAS500	73	73.0	TRUE
SRR1104963	NGAS008	122	122.2	TRUE
SRR1106025	NGAS746	4	4.0	TRUE
SRR1105999	NGAS642	87	87.0	TRUE
SRR1105979	NGAS608	82	82.0	TRUE
SRR1106023	NGAS739	87	87.0	TRUE
SRR1105993	NGAS633	83	83.1	TRUE
SRR1105884	NGAS240	82	82.0	TRUE
SRR1105917	NGAS328	82	82.0	TRUE
SRR1105991	NGAS629	83	83.1	TRUE
SRR1105919	NGAS332	82	82.0	TRUE
SRR1106022	NGAS737	4	4.0	TRUE
SRR1105908	NGAS312	80	80.0	TRUE
SRR1106034	NGAS760	4	4.0	TRUE
SRR1105976	NGAS604	75	75.0	TRUE
SRR1105995	NGAS638	101	101.0	TRUE
SRR1105974	NGAS601	82	82.0	TRUE
SRR1105945	NGAS440	29	29.2	TRUE
SRR1105889	NGAS260	12	12.8	TRUE
SRR1106027	NGAS749	12	12.0	TRUE
SRR1105896	NGAS292	87	87.0	TRUE
SRR1104983	NGAS100	3	3.1	TRUE
SRR1105909	NGAS316	83	83.1	TRUE
SRR1105910	NGAS317	82	82.0	TRUE
SRR1105904	NGAS305	1	1.0	TRUE
SRR1105946	NGAS447	12	12.0	TRUE
SRR1105957	NGAS505	105	105.0	TRUE
SRR1105978	NGAS606	80	80.0	TRUE
SRR1105921	NGAS335	87	87.0	TRUE
SRR1106024	NGAS743	87	87.0	TRUE
SRR1105914	NGAS322	114	114.0	TRUE
SRR1105989	NGAS625	114	114.0	TRUE
SRR1106013	NGAS671	2	2.0	TRUE
SRR1105940	NGAS419	3	3.1	TRUE
SRR1104972	NGAS061	1	1.0	TRUE
SRR1105958	NGAS508	87	87.0	TRUE
SRR1106019	NGAS726	68	68.3	TRUE
SRR1105890	NGAS266	3	3.1	TRUE
SRR1105912	NGAS320	83	83.1	TRUE
SRR1105939	NGAS413	1	1.0	TRUE
SRR1104966	NGAS026	89	89.0	TRUE
SRR1105949	NGAS473	82	82.0	TRUE
SRR1105885	NGAS241	82	82.0	TRUE
SRR1105907	NGAS311	118	118.0	TRUE
SRR1105887	NGAS253	83	83.1	TRUE
SRR1104979	NGAS084	28	28.0	TRUE
SRR1105992	NGAS630	87	87.0	TRUE
SRR1106018	NGAS719	90	90.5	TRUE
SRR1106004	NGAS657	1	1.0	TRUE
SRR1105947	NGAS450	1	1.0	TRUE
SRR1104977	NGAS078	1	1.0	TRUE
SRR1106007	NGAS663	89	89.0	TRUE
SRR1105881	NGAS227	102	102.2	TRUE
SRR1105930	NGAS346	41	41.2	TRUE
SRR1105985	NGAS616	22	22.0	TRUE
SRR1105966	NGAS556	87	87.0	TRUE
SRR1105994	NGAS634	87	87.0	TRUE
SRR1105942	NGAS426	3	3.1	TRUE
SRR1105892	NGAS287	6	6.0	TRUE
SRR1106005	NGAS660	89	89.0	TRUE
SRR1105943	NGAS428	5	5.14	TRUE
SRR1105982	NGAS612	87	87.0	TRUE
SRR1104982	NGAS096	12	12.0	TRUE
SRR1105871	NGAS151	6	6.0	TRUE
SRR1106000	NGAS643	83	83.1	TRUE
SRR1105950	NGAS474	87	87.0	TRUE
SRR1106002	NGAS653	28	28.0	TRUE
SRR1105913	NGAS321	59	59.0	TRUE
SRR1106017	NGAS717	92	92	TRUE
SRR1105965	NGAS549	89	89.0	TRUE
SRR1106021	NGAS732	94	94.0	TRUE
SRR1105935	NGAS367	169	60	FALSE	Mapping and de novo detect both emm60 and emm169.3
SRR1105944	NGAS438	73	73.0	TRUE
SRR1105988	NGAS623	1	1.0	TRUE
SRR1105996	NGAS639	59	59.0	TRUE
SRR1105899	NGAS298	87	87.0	TRUE
SRR1105998	NGAS641	114	114.0	TRUE
SRR1105870	NGAS148	5	5.14	TRUE
SRR1105897	NGAS296	4	Not determined: 4.0**	FALSE	De novo confirms 4.0
SRR1106006	NGAS662	87	87	TRUE
SRR1105867	NGAS128	14	Mixed sample: 14.3/51.0	FALSE	De novo confirms presence of both emm14.3 and emm51.0
SRR1104976	NGAS076	1	1.0	TRUE
SRR1106008	NGAS664	74	74.0	TRUE
SRR1105911	NGAS319	83	83.1	TRUE
SRR1105990	NGAS628	87	87.0	TRUE
SRR1105906	NGAS308	18	18.0	TRUE
SRR1105916	NGAS325	22	22.0	TRUE
SRR1105888	NGAS255	1	1.0	TRUE
SRR1105886	NGAS245	58	58.0	TRUE
SRR1105938	NGAS408	1	1.0	TRUE
SRR1104974	NGAS071	87	87.0	TRUE
SRR1105865	NGAS113	122	122.0	TRUE
SRR1105923	NGAS337	82	82.0	TRUE
SRR1105941	NGAS425	1	1.0	TRUE
SRR1105880	NGAS226	2	2.0	TRUE
SRR1105928	NGAS344	75	75.0	TRUE
SRR1105915	NGAS323	82	82.0	TRUE
SRR1105898	NGAS297	1	1.0	TRUE
SRR1105954	NGAS495	82	82.0	TRUE
SRR1105926	NGAS340	118	118.0	TRUE
SRR1105980	NGAS609	82	82.0	TRUE
SRR1105971	NGAS596	82	82.0	TRUE
SRR1105997	NGAS640	11	11.0	TRUE
SRR1106033	NGAS759	4	4.0	TRUE
SRR1105970	NGAS595	89	89.0	TRUE
SRR1105905	NGAS306	83	83.1	TRUE
SRR1105956	NGAS501	82	82.0	TRUE
SRR1105877	NGAS197	89	89.0	TRUE
SRR1106012	NGAS670	4	4.0	TRUE
SRR1105893	NGAS289	6	6.0	TRUE
SRR1105968	NGAS592	82	82.0	TRUE
SRR1105948	NGAS465	29	29.1	TRUE
SRR1105961	NGAS520	83	83.1	TRUE
SRR1106015	NGAS673	89	89.0	TRUE
SRR1105951	NGAS481	82	82.0	TRUE
SRR1106030	NGAS755	101	101.0	TRUE
SRR1104970	NGAS056	1	1.0	TRUE
SRR1106009	NGAS665	87	87	TRUE
SRR1106016	NGAS675	4	4.0	TRUE
SRR1106003	NGAS655	83	83.1	TRUE
SRR1104967	NGAS035	1	1.0	TRUE
SRR1105975	NGAS603	6	6.0	TRUE
SRR1104971	NGAS057	88	88.3	TRUE
SRR1104978	NGAS083	1	1.0	TRUE
SRR1106014	NGAS672	89	89.0	TRUE
SRR1105931	NGAS347	82	82.0	TRUE
SRR1106029	NGAS751	115	115.0	TRUE
SRR1105987	NGAS620	83	83.1	TRUE
SRR1105967	NGAS565	87	87.0	TRUE
SRR1105973	NGAS599	114	114.1	TRUE
SRR1105878	NGAS202	1	1.0	TRUE
SRR1104975	NGAS075	9	9.0	TRUE
SRR1105922	NGAS336	1	1.0	TRUE
SRR1106028	NGAS750	1	1.0	TRUE
